# Supplementary material for: Construction of a Z-scheme heterojunction with camellia-like MnCo2O4/TiO2 for photogenerated cathodic protection
Source: Royal Society of Chemistry journal article supplement (doi:10.1039/d4ta03903c), 2024-12-02
Supplement: d4ta03903c1.pdf [file d4ta03903c1.pdf]

## Supplementary Material

### Construction of Z-scheme heterojunction with Camellia-like

#### MnCo<sub>2</sub>O<sub>4</sub>/TiO<sub>2</sub> for photogenerated cathodic protection

Yanan Sun<sup>a,d</sup>, Xiutong Wang<sup>a,d</sup>\*, Congtao Sun<sup>a</sup>, Shengxun Yao<sup>b</sup>, Mingxing Wang<sup>a</sup>,  
Jiayan Pu<sup>a</sup>, Youbo Nan<sup>a</sup>, Jingshun He<sup>a</sup>, Xi Chen<sup>a</sup>, Yanliang Huang<sup>a</sup>, Fanglin Du<sup>c</sup>

<sup>a</sup> Key Laboratory of Advanced Marine Materials, Key Laboratory of Marine Environmental Corrosion and Bio-fouling, Institute of Oceanology, Chinese Academy of Sciences, Qingdao 266071, China

<sup>b</sup> Institute of Marine Corrosion Protection, Guangxi Key Laboratory of Marine Environmental Science, Guangxi Academy of Sciences, Nanning 530007, China

<sup>c</sup> College of Materials Science and Engineering, Qingdao University of Science and Technology, Qingdao 266042, China

<sup>d</sup> University of Chinese Academy of Sciences, Beijing 100049, China

\* Corresponding author: Xiutong Wang, E-mail: [wangxiutong@qdio.ac.cn](mailto:wangxiutong@qdio.ac.cn)

### Reagents and materials

Ti foil (99.96% purity), 304SS, Ammonium fluoride (NH<sub>4</sub>F), sodium sulfide (Na<sub>2</sub>S·9H<sub>2</sub>O), sodium chloride (NaCl), sodium hydroxide (NaOH), glycol, manganese acetate tetrahydrate ((CH<sub>3</sub>COO)<sub>2</sub>Mn·4H<sub>2</sub>O), Cobalt acetate tetrahydrate ((CH<sub>3</sub>COO)<sub>2</sub>Co·4H<sub>2</sub>O), polyvinyl pyrrolidone (PVP), nitric acid and 30% hydrogen peroxide (H<sub>2</sub>O<sub>2</sub>) were obtained from Sinopharm Chemical Reagent Co., Ltd. All existing reagents are AR. Ultrapure water is taken from the Flom ultrapure water system (Qingdao, China). Saturated calomel electrode and platinum foil electrode were purchased from Tianjin Aida Hengsheng Technology Co., Ltd. (Tianjin, China).

### Characterization methods

The morphology and structure of the samples were characterized by scanning electron microscopy (SEM, Hitachi, S-4800, Japan) and transmission electron microscopy (TEM, JEM-2100P, Japan). X-ray diffraction (XRD, Bruker D8ADVANCE, Germany) was used to study the crystal structure of samples. X-ray photoelectron spectroscopy (XPS, Thermo Escalab 250Xi, USA) was used to detect the surface element composition and valence states of samples, and in situ XPS technology was used to study the electron transfer process on the surface of composite materials before and after irradiation. The light absorption characteristics of the sample were characterized by UV-vis diffuse reflectance spectroscopy (UV-vis DRS, Hitachi U-3900H, Japan). Ultraviolet photoelectron spectroscopy (UPS) can obtain information on the work function, energy level structure, and other aspects of solids. A 300 W high-pressure xenon lamp (PLS-SXE 300C, Beijing Perfectlight, China) equipped with a 420 nm filter simulated visible light, and the light intensity was  $320 \text{ mW}\cdot\text{cm}^{-2}$ .

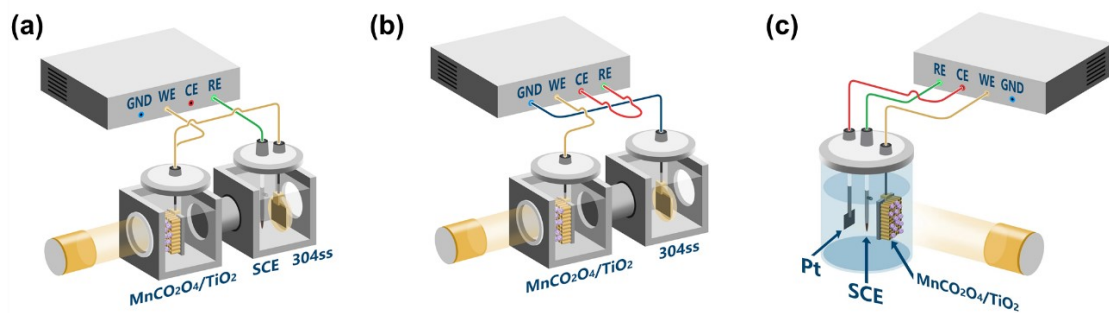

**Fig. S1** Photochemical test device diagram, (a) for OCP; (b) for i-t; (c) for i-V and EIS.

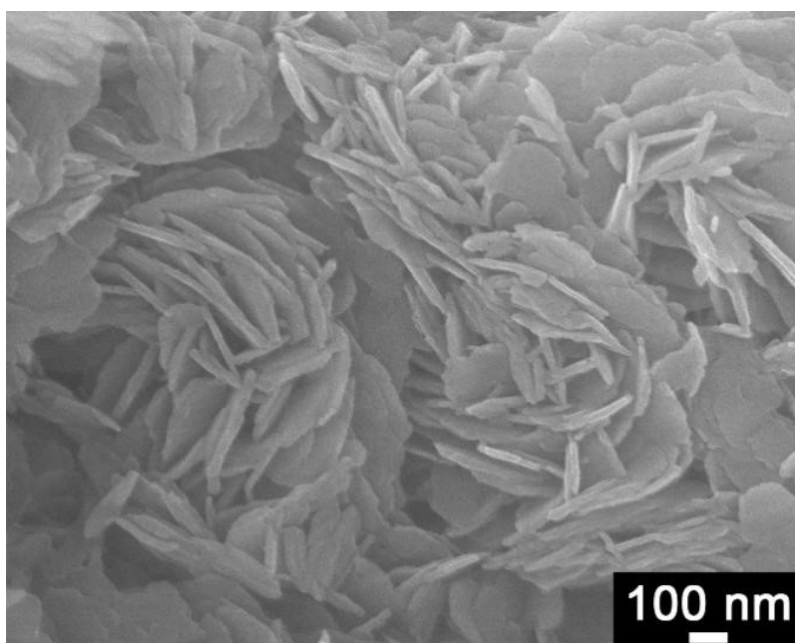

**Fig. S2** SEM image of  $\text{MnCo}_2\text{O}_4$  before sintering.

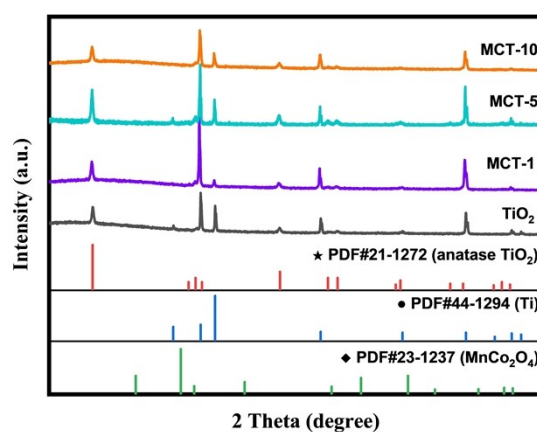

**Fig. S3** Pure  $\text{TiO}_2$ , MCT-1, MCT-5, and MCT-10 XRD patterns.

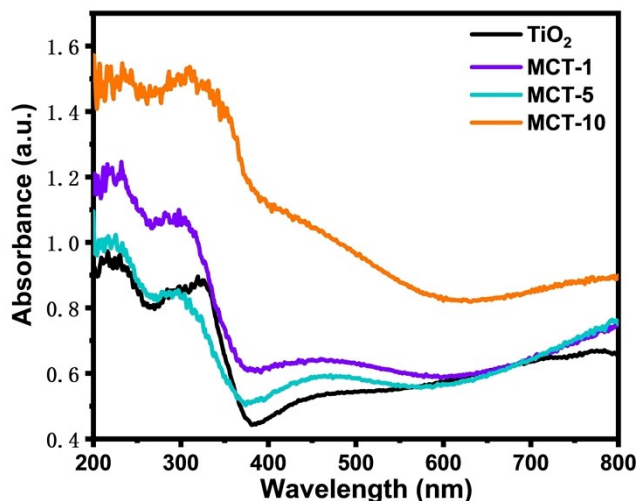

Fig. S4 UV-vis DRS absorption spectra of pure  $\text{TiO}_2$ , MCT-1, MCT-5 and MCT-10.

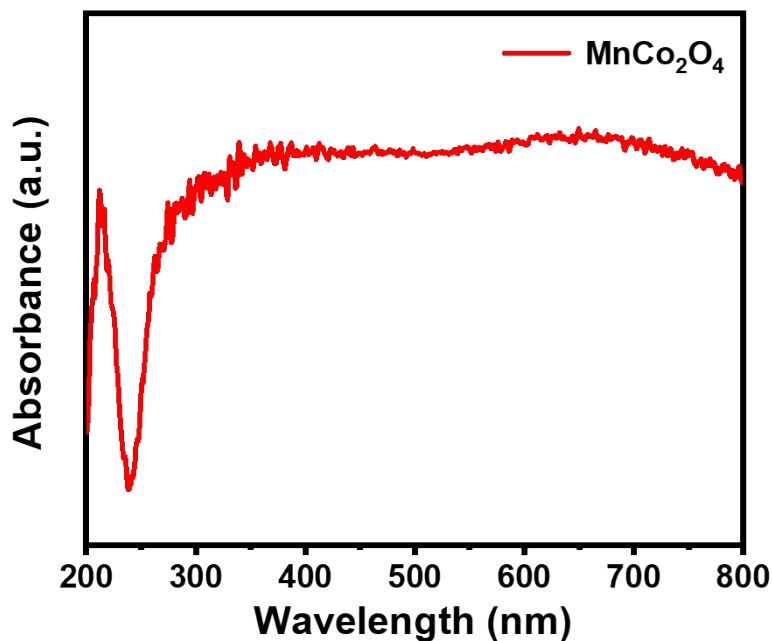

Fig. S5 UV-vis DRS absorption spectra of pure  $\text{MnCo}_2\text{O}_4$ .

Note 1

The main reasons for the errors in fluorescence lifetime are divided into the following parts:

(1) The empirical formula is a polynomial, hence the number of undetermined parameters varies.

(2) The graphical representation of the empirical formula, the former is a straight line, while the latter is a parabola.

(3) Under the method of least squares, a system of linear equations regarding the undetermined parameters is obtained, the former being of the second order, and the latter of the third order.

Single-exponential function :

$$I(t) = I_0 \exp\left(-t/\tau\right)$$

$$I(t) = I_0 + A_1 \exp\left(-t/\tau_1\right) + A_2 \exp\left(-t/\tau_2\right)$$

$$\tau = (A_1\tau_1^2 + A_2\tau_2^2)/(A_2 \exp\left(-t/\tau_2\right))$$

Double-exponential function :

$$I = A_1 \exp\left(-\frac{t}{\tau_1}\right) + A_2 \exp\left(-\frac{t}{\tau_2}\right) + A_3 \exp\left(-\frac{t}{\tau_3}\right)$$

Triple-exponential function :

$$\tau_{avg} = \frac{A_1\tau_1^2 + A_2\tau_2^2 + A_3\tau_3^2}{A_1\tau_1 + A_2\tau_2 + A_3\tau_3}$$

Table S1 ICP-MS for different MCT

| Sample | Element | Mass percentage (%) |
|--------|---------|---------------------|
| MCT-1  | Co      | 0.723               |
|        | Mn      | 0.562               |
|        | Ti      | 67.743              |
| MCT-5  | Co      | 0.691               |
|        | Mn      | 0.623               |
|        | Ti      | 58.671              |
| MCT-10 | Co      | 0.578               |
|        | Mn      | 0.612               |
|        | Ti      | 65.132              |
